# Supplementary material for: Elimination of space charge effects in passivation films: the key to substantially enhancing the dielectric properties of tantalum oxide films
Source: Royal Society of Chemistry journal article supplement (doi:10.1039/d5tc01178g), 2025-01-01
Supplement: d5tc01178g1.pdf [file d5tc01178g1.pdf]

## Supporting Information

### Elimination of Space Charge Effects in Passivation Films: The Key to Substantially Enhancing the Dielectric Properties of Tantalum Oxide Films

Jiping Zhao<sup>1,\*</sup>, Jingjing Liu<sup>2</sup>, Xiaoxuan Zhu<sup>1</sup>, Beibei Wang<sup>1</sup>, Hongbing Cai<sup>1</sup>, Jingsong Xu<sup>1,\*</sup>

<sup>1</sup> JSNU-SPbPU Institute of Engineering, Jiangsu Normal University, Xuzhou, Jiangsu 221116, China

<sup>2</sup> School of Physics and Electronic Engineering, Jiangsu Normal University, Xuzhou, Jiangsu 221116, China

\* Corresponding author

E-mail address: [jip\\_zhao@jsnu.edu.cn](mailto:jip_zhao@jsnu.edu.cn) (Jiping Zhao); [casxjs2003@jsnu.edu.cn](mailto:casxjs2003@jsnu.edu.cn) (Jingsong Xu)

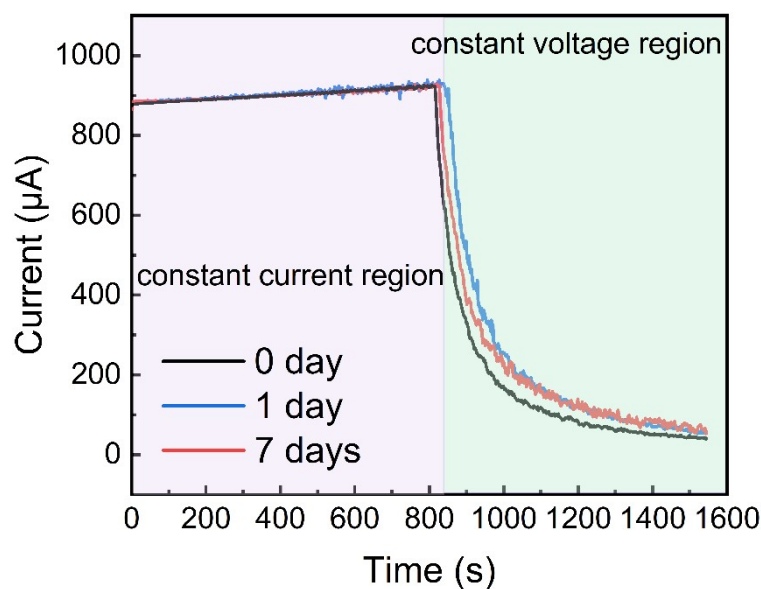

Fig. S1. Current-time curves during the anodic oxidation process for samples with different aging states (unaged, 1-day aged, and 7-day aged).
